# Supplementary material for: Visualizing multiple inter-organelle contact sites using the organelle-targeted split-GFP system
Source: PubMed Central journal article supplement (PMC5906596; doi:10.1038/s41598-018-24466-0), 2018-04-18
Supplement: 41598_2018_24466_MOESM1_ESM.pdf [file 41598_2018_24466_MOESM1_ESM.pdf]

## Supplementary Information

# Visualizing multiple inter-organelle contact sites using the organelle-targeted split-GFP system

Yuriko Kakimoto<sup>1</sup>, Shinya Tashiro<sup>1</sup>, Rieko Kojima<sup>1</sup>, Yuki Morozumi<sup>1</sup>, Toshiya Endo<sup>2</sup> & Yasushi Tamura<sup>1\*</sup>

<sup>1</sup> Faculty of Science, Yamagata University, 1-4-12 Kojirakawa-machi, Yamagata, Yamagata 990-8560, Japan. <sup>2</sup> Faculty of Life Sciences, Kyoto Sangyo University, Kamigamo-motoyama, Kita-ku, Kyoto 603-8555, Japan.

\*Correspondence and requests for materials should be addressed to Y.T. (email:tamura@sci.kj.yamagata-u.ac.jp)

## Contents

**Supplementary figures S1 to S6, Materials and Table S1 and S2**

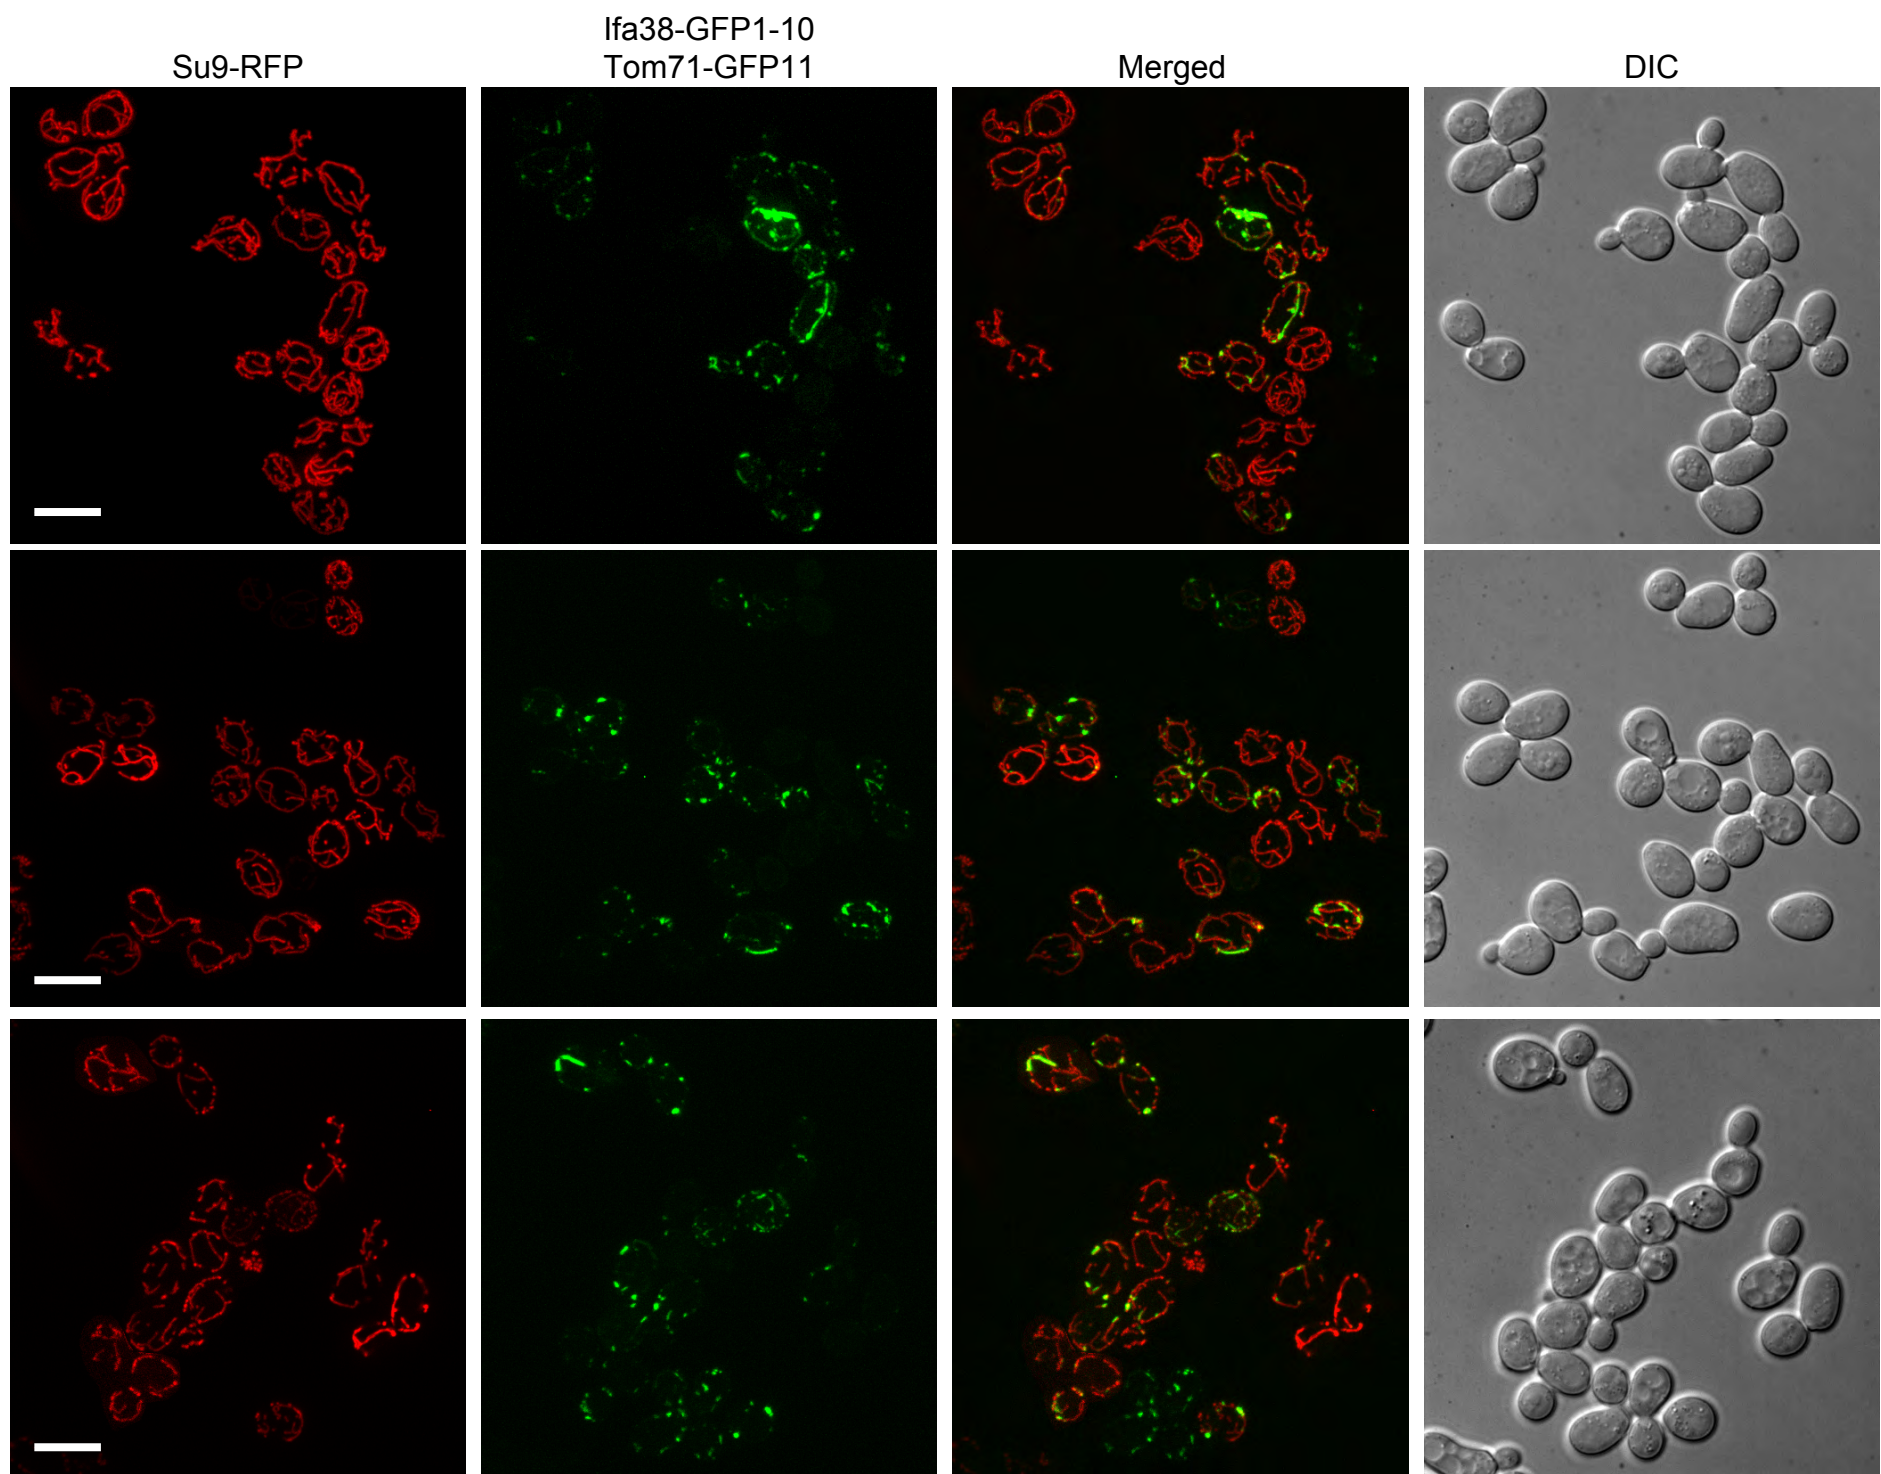

Kakimoto et al., Figure S1

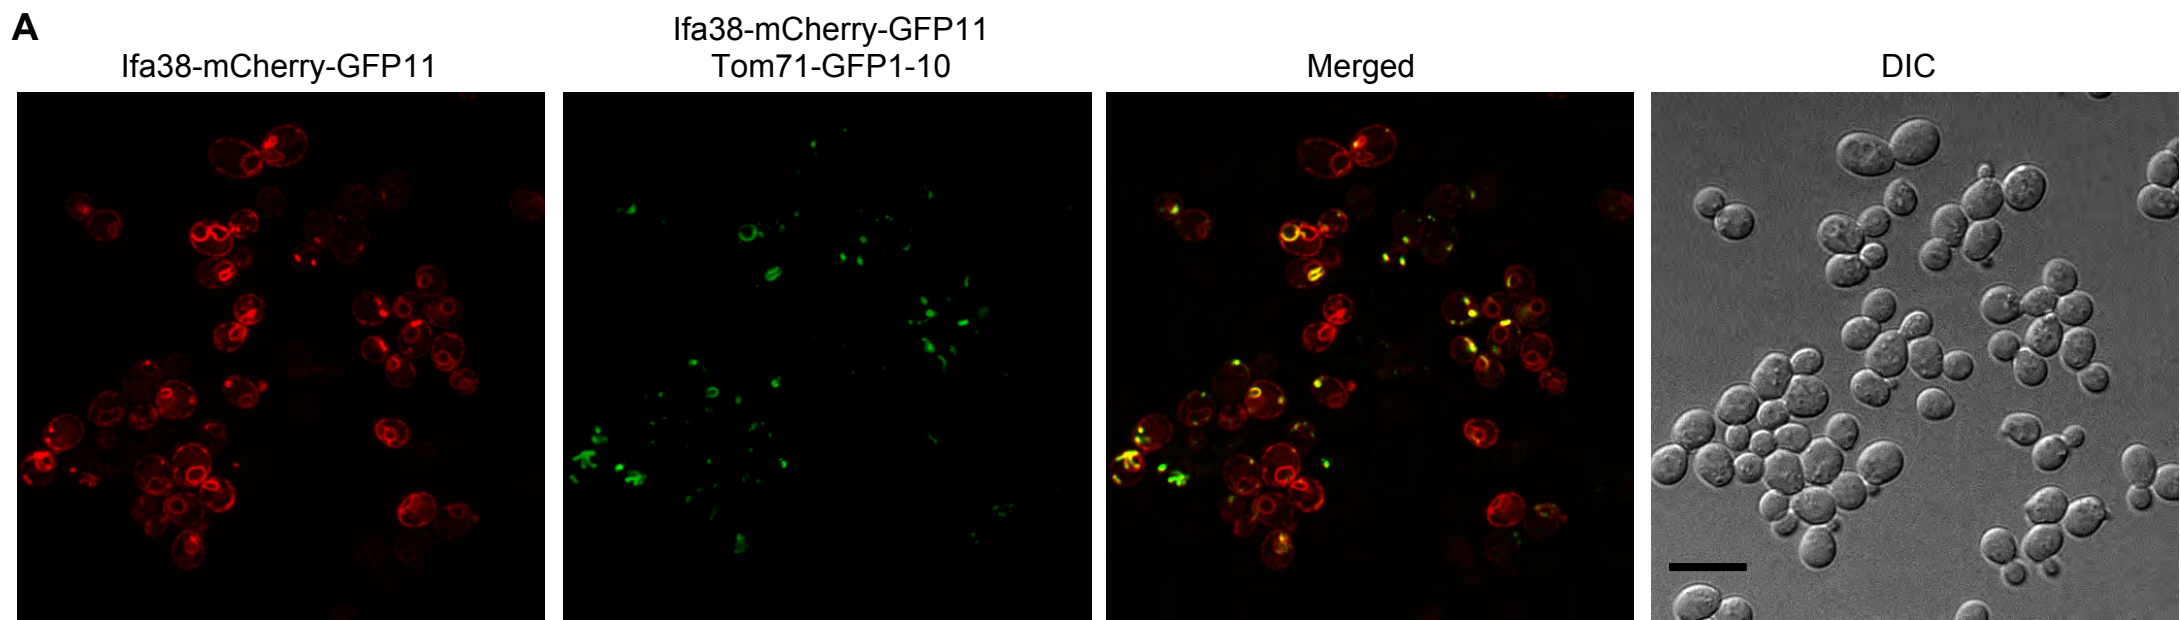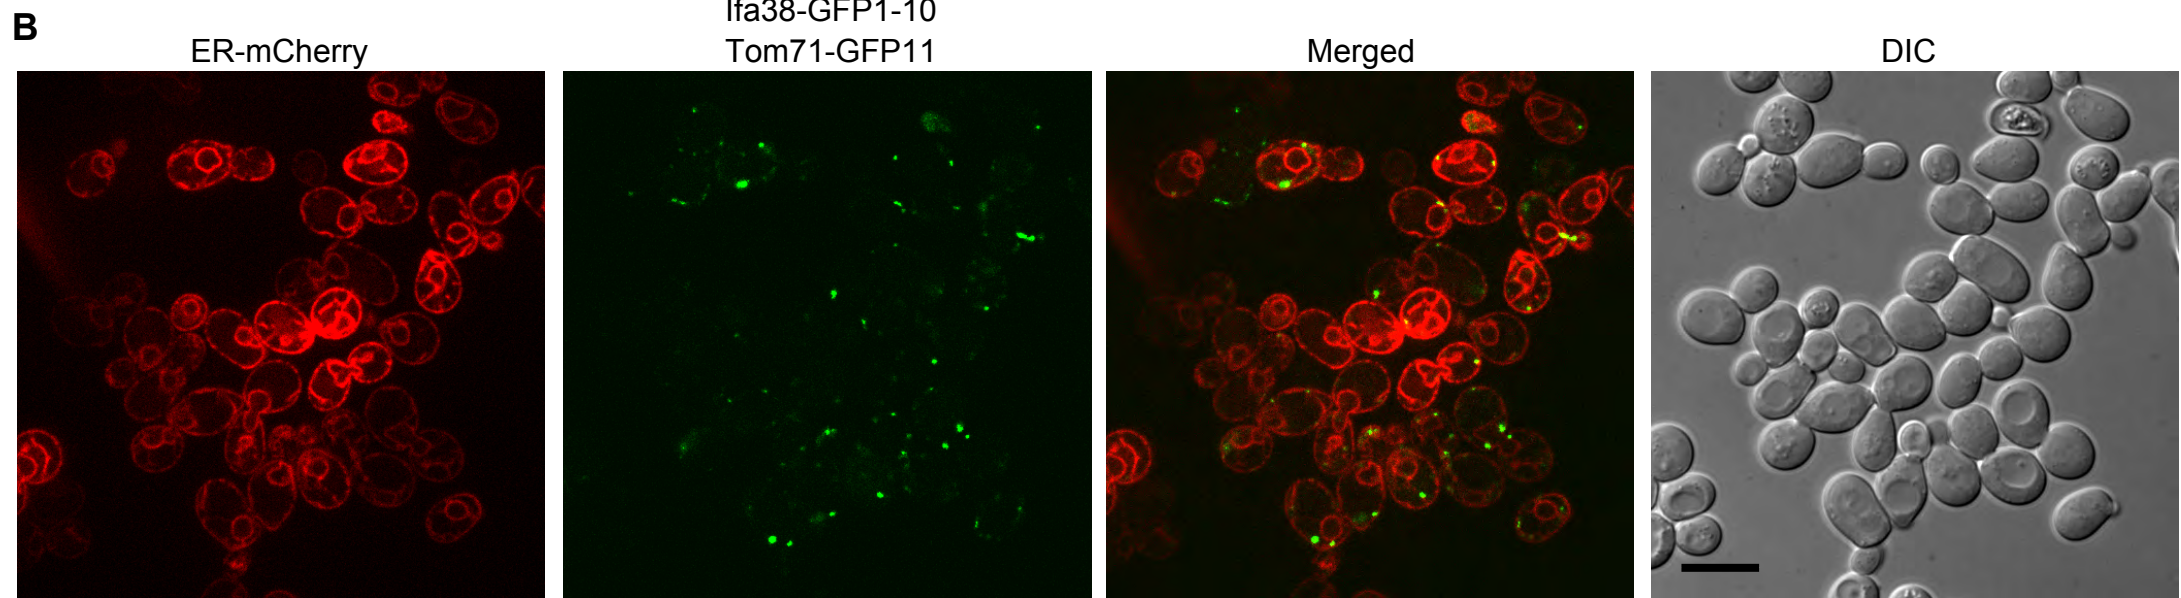

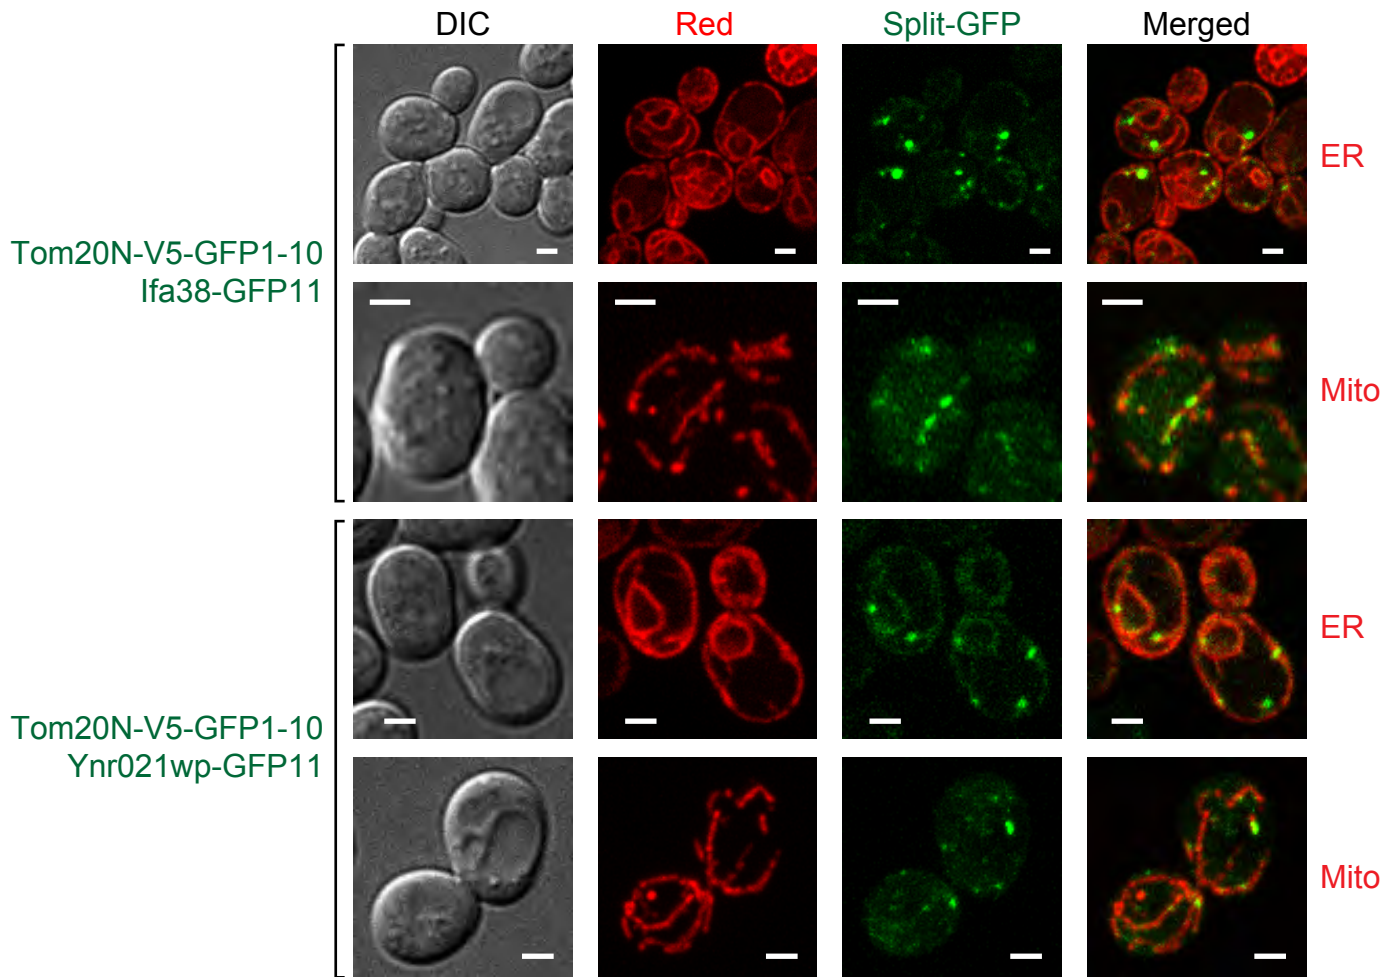

**Kakimoto et al., Figure S3**

**A** Tom20N-FLAG-GFP1-10, Sec63N-V5-GFP11

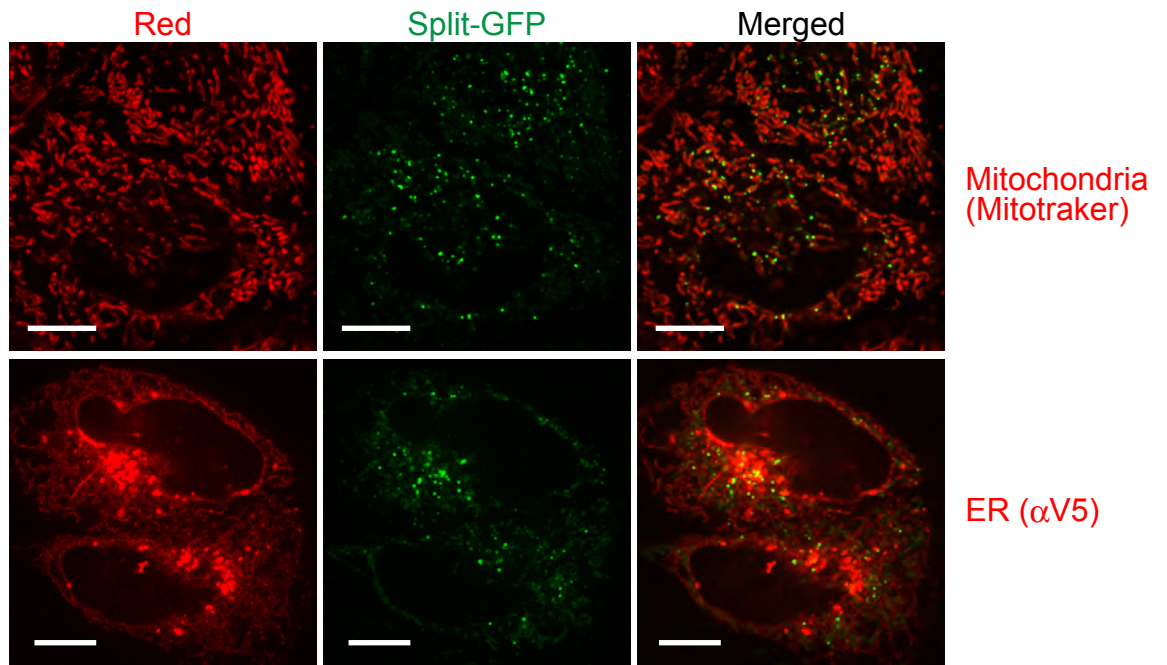

**B** Tom70N-FLAG-GFP1-10, ERj1N-V5-GFP11

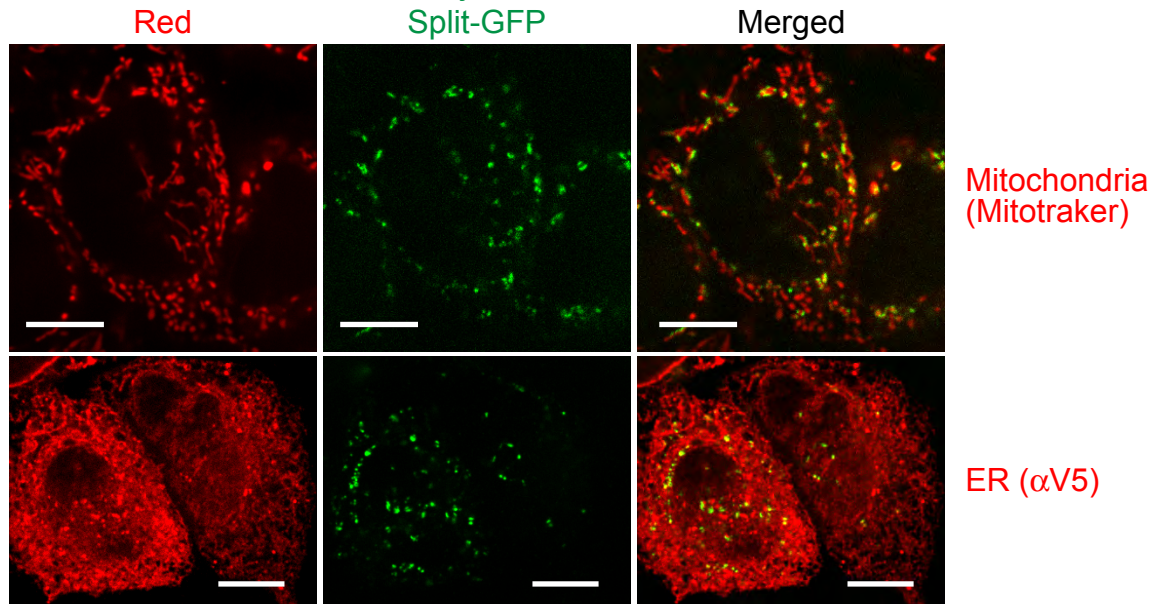

**C** Tom70N-FLAG-GFP1-10, Sec63N-V5-GFP11

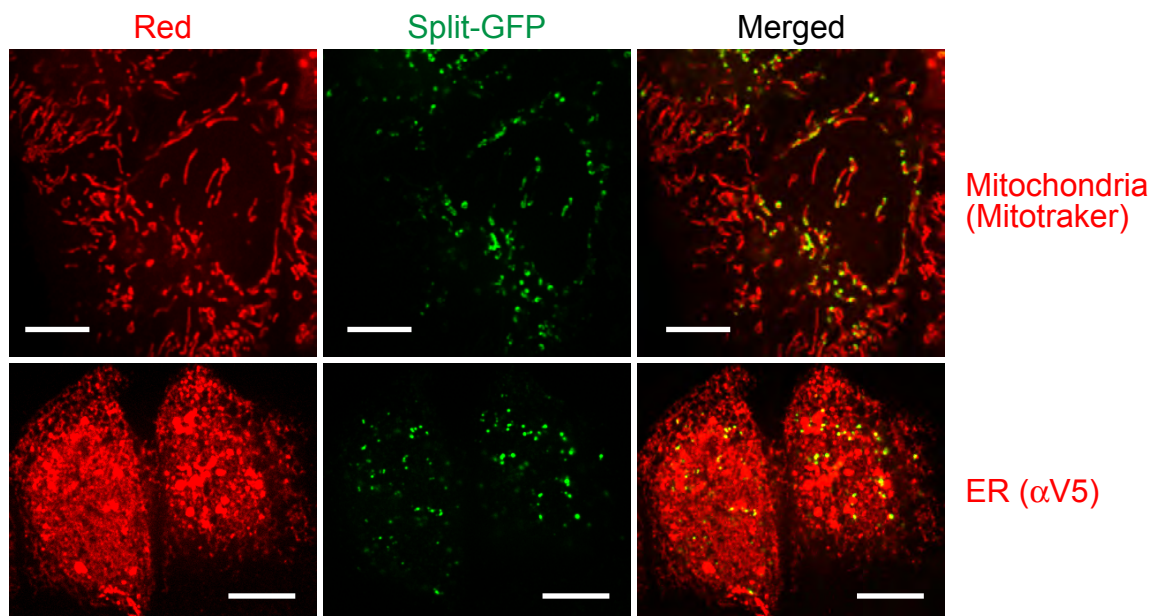

*mmm1*Δ

ER-GFP

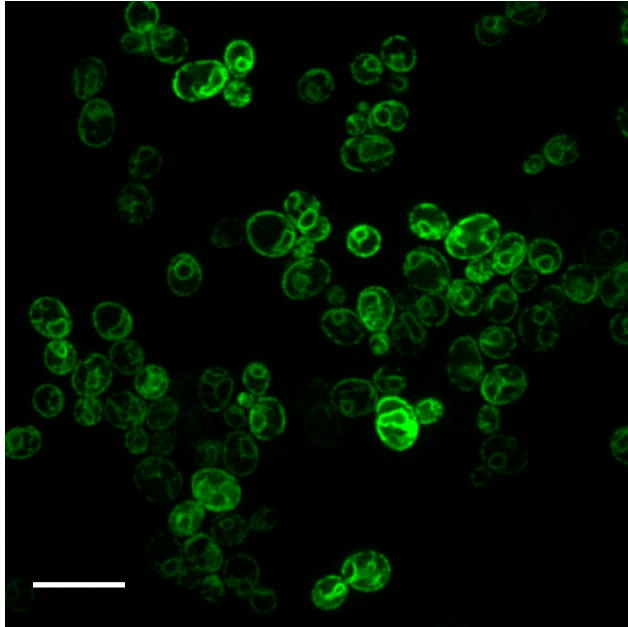

Mitotracker

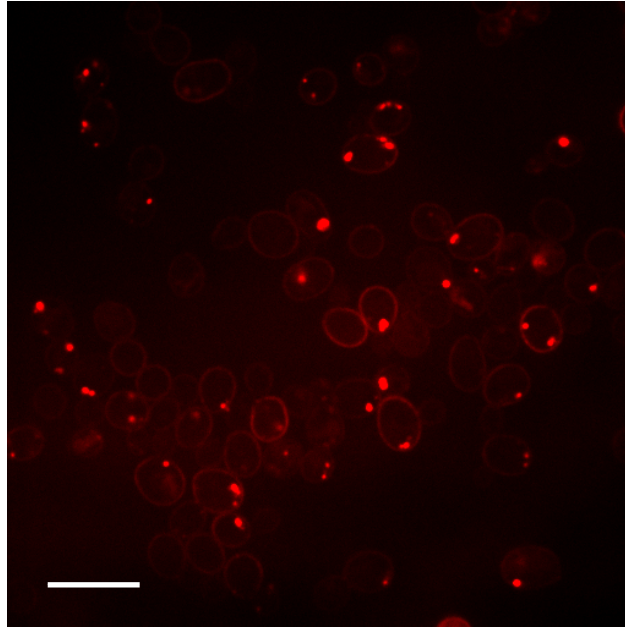

Merged

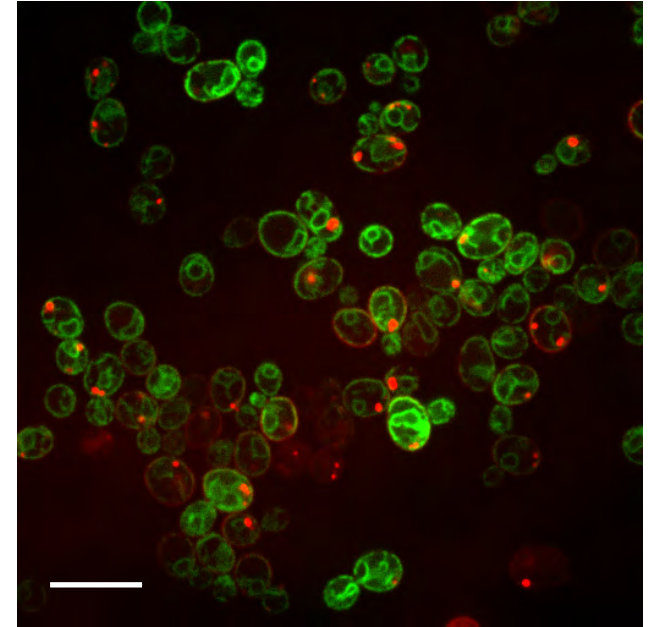

**Kakimoto et al., Figure S5**

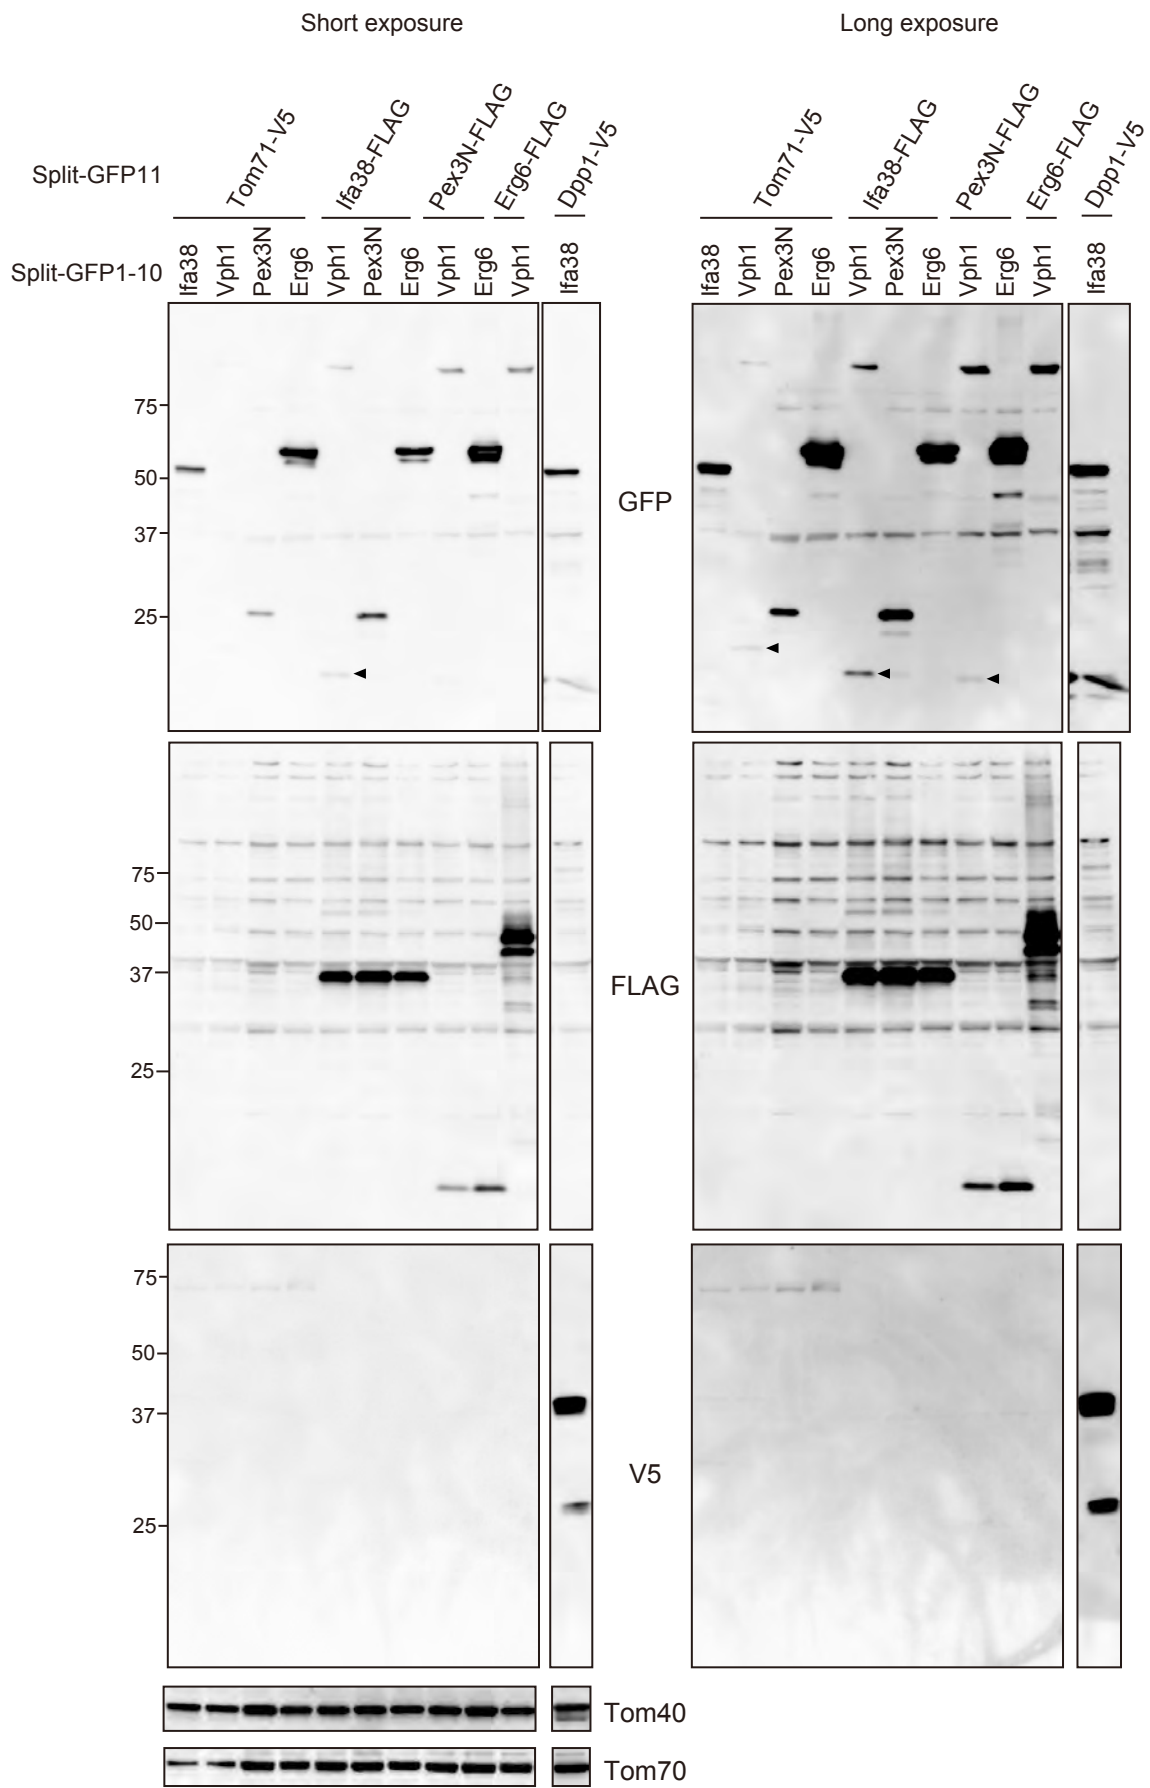

**Kakimoto et al., Figure S6**

**Figures S1 and S2. Representative images showing cells expressing split-GFP probes for visualizing the ER-mitochondria contact sites.** Yeast cells expressing Ifa38-GFP1-10 and Tom71- GFP11 (S1), Ifa38-mCherry-GFP and Tom71-GFP1-10 (S2A) and Ifa38-GFP1-10 and Tom71-GFP11 (S2B) were imaged by confocal fluorescent microscopy. Maximum projection images of whole visual microscope field were reconstituted from the z-stacks and were shown. Scale bar represents 10  $\mu\text{m}$ .

**Figure S3. The ER-mitochondria contact sites visualized with split-GFP fragments in yeast.**

Yeast cells expressing split-GFP proteins, Tom20N-V5-GFP1-10 and Ifa38-GFP11 or Ynr021wp-GFP11, and mitochondria-targeted RFP (Mito) or the ER-targeted mCherry (ER) were imaged by confocal fluorescent microscopy. Scale bar represents 2  $\mu\text{m}$ .

**Figure S4. The ER-mitochondria contact sites visualized with the split-GFP system in HeLa cells.**

A-C HeLa cells transiently expressing Tom20N-FLAG-GFP1-10 and Sec63N-V5-GFP11 (A), Tom70N-FLAG-GFP1-10 and ERj1N-V5-GFP11 (B), Tom70N-FLAG-GFP1-10 and Sec63N-V5-GFP11 (C), were stained with MitoTracker and immediately observed (upper panel) or fixed and subjected to immunofluorescence using anti-V5 antibodies (lower panel). Scale bar represents 10  $\mu\text{m}$ .

**Figure S5. The ER and mitochondria associate in the absence of Mmm1.**

Yeast cells expressing ER-targeted GFP were stained with MitoTracker Red CMXRos and imaged by confocal fluorescent microscopy. Single focal plane images of whole visual microscope field were shown. Scale bar represents 10  $\mu\text{m}$ .

**Figure S6. Immunoblotting of total cell lysates showing the expression levels of split-GFP probes.**

Total cell lysates were prepared from logarithmically growing cells expressing the indicated split-GFP fusion proteins and were analyzed by immunoblotting using the indicated antibodies. Arrowheads indicate degraded products



from Vph1-GFP1-10.

## **Materials**

### **DNA sequences for the split-GFP fragments and organelle-targeting signals**

#### **GFP1-10**

CATGGGTGGCACTAGTATGAGCAAAGGAGAAGAAGCTTTTCACTGGAGTTGT  
CCCAATTCTTGTTGAATTAGATGGTGATGTTAATGGGCACAAATTTTCTGTC  
AGAGGAGAGGGTGAAGGTGATGCTACAATCGGAAAACCTCACCTTAAATTT  
ATTTGCACTACTGGAAAACCTACCTGTTCCATGGCCAACACTTGTCACTACTC  
TGACCTATGGTGTTCAATGCTTTTCCCGTTATCCGGATCACATGAAAAGGCA  
TGACTTTTTCAAGAGTGCCATGCCCGAAGGTTATGTACAGGAACGCACTATA  
TCTTTCAAAGATGACGGGAAATACAAGACGCGTGCTGTAGTCAAGTTTGAA  
GGTGATAACCCTTGTTAATCGTATCGAGTTAAAGGGTACTGATTTTAAAGAAG  
ATGGAAACATTCTCGGACACAAACTCGAGTACAACCTTAACTCACACAATG  
TATACATCACGGCAGACAAACAAAAGAATGGAATCAAAGCTAACTTCACAG  
TTCGCCACAACGTTGAAGATGGTTCCGTTCAACTAGCAGACCATTATCAACA  
AAATACTCCAATTGGCGATGGCCCTGTCCTTTTACCAGACAACCATTACCTG  
TCGACACAAACTGTCCTTTTCGAAAGATCCCAACGAAAAGTAA

#### **GFP11**

CGATGGAGGGTCTGGTGGCGGATCAACAAGTCGTGACCACATGGTCCTTCA  
TGAGTACGTAAATGCTGCTGGGATTACATAA

#### **3xFLAG-GFP11**

TCTGCCGGTGGTGATTACAAAGACCATGATGGCGATTATAAGGATCATGAC  
ATTGACTATAAGGATGATGACGATAAAGGCGGAAGTGGTGGAGGTTCAACT  
TCCAGAGATCACATGGTTTTGCATGAATACGTCAATGCTGCAGGGATAACA  
TAA

#### **V5-GFP11**

TCTGCCGGAGGTTCTGGGAAACCCATACCAAACCTCTTTTGGGCTTAGACT  
CAACTGGTGGAAGTGGTGGTGGTTCACAAAGCAGAGATCATATGGTTCTAC  
ACGAATATGTCAATGCTGCAGGCATTACCTAA

**ERj1(1-200)-V5**

GCCACCATGACTGCTCCGTGCTCTCAACCCGCACAACCTGCCAGGACGGAGA  
CAGCTGGGTCTGGTACCTTTTCCTCCTCCACCACCACGTACACCTCTGCTGT  
GGTTGCTGCTTCTGCTGCTTGCTGCGGTTGCACCGGCTAGAGGATGGGAATC  
CGGCGATTTGGAGCTGTTTGACCTGGTTCGAAGAAGTGCAGTTGAACTTCTAC  
CAGTTTCTCGGGGTACAACAGGATGCCAGCTCAGCTGATATCCGCAAAGCC  
TATCGGAAATTGTCCCTCACACTGCATCCCGATAAGAACAAAGACGAGAAT  
GCCGAAACCCAGTTCAGACAGCTCGTGGCCATTTACGAGGTCTGAAAGAC  
GATGAGAGGAGACAGAGGTATGACGACATTCTGATCAACGGACTGCCCGAC  
TGGCGACAGCCTGTGTTCTACTATAGGCGAGTGCGGAAGATGTCCAATGCC  
GAGCTTGCCCTGCTTCTCTTCATCATTCTCACGGTTGGCCACTATGCAGTCGT  
GTGGAGCATCTACCTGGAGAAACAGCTGGATGAGCTCCTGTCACGCAAGAA  
GCGCGAAAAGAAGAAGAAAACCGGCAGTAAGAGCGTGGATGGGAAACCCA  
TACCCAATCCACTCCTGGGTCTTACTCTACTGGAGGGAGTGGCGGC

**Sec63(1-240)-V5**

GCCACCATGGCCGGACAACAGTTCAGTATGACGACTCAGGGAACACCTTC  
TTCTACTTCCTGACATCCTTCGTCGGCCTGATCGTCATACCAGCGACCTACT  
ACCTCTGGCCCAGAGATCAGAACGCAGAACAGATACGGCTCAAGAACATTC  
GTAAGGTGTATGGACGGTGCATGTGGTACCGCCTTAGACTGCTGAAACCTC  
AACCCAACATCATACCCACTGTCAAGAAAATCGTGCTGTTGGCAGGATGGG  
CTCTGTTTCTCTTTCTGGCCTACAAAGTGAGCAAGACAGACAGGGAGTATCA  
GGAGTACAACCCGTATGAAGTGCTCAATCTTGATCCAGGCGCTACAGTGGC  
CGAAATCAAGAAGCAGTATCGATTGTTGAGCCTCAAGTATCACCCCGATAA  
AGGAGGCGATGAGGTGATGTTTATGCGCATTGCCAAAGCGTATGCAGCACT  
GACTGACGAAGAGTCTAGGAAGAATTGGGAGGAGTTTGGGAATCCTGATGG  
TCCACAAGCTACCTCCTTTGGTATCGCCCTTCTGCTTGGATCGTTGACCAG  
AAGAACAGTATTCTGGTCCTGCTGGTTTACGGACTTGCCTTTATGGTGATTC

TGCCAGTAGTAGTTGGGTCATGGTGGTATAGGTCCATCAGATACAGCGGGG  
ACCAGATTCTGATTCGGACGACACAGATTTACACCTACTTCGTGTACAAAAC  
CCGCAATGGCAAACCTATCCCGAATCCCCTGTTGGGGCTGGATAGTACTGG  
CGGTTCTGGCGGC

**Tom20(1-33)-FLAG**

GCCACCATGGTGGGCAGGAACAGCGCCATCGCCGCCGGCGTGTGCGGGCGCC  
CTGTTTCATCGGCTACTGTATCTATTTTGACCGGAAGCGGAGATCCGACCCCA  
ATGATTACAAGGACCACGATGGCGACTATAAGGATCACGACATCGATTACA  
AGGACGATGACGATAAGGGCGGCTCTGGCG

**Tom70(1-70)-3XFLAG**

GCCACCATGGCCGCGTCCAAACCCGTGGAAGCAGCCGTCGTTGCAGCCGCT  
GTGCCGAGCTCTGGGTCAGGCGTGGGTGGAGGAGGAACCGCTGGTCCCGGA  
ACAGGCGGCCTTCCTCGGTGGCAGTTGGCCCTGGCTGTAGGGGCACCACTG  
CTCCTGGGAGCTGGGGCCATCTATCTGTGGAGCCGCCAACAGCGTCGAAGG  
GAGGCCAGAGGGGACTATAAGGACCATGATGGGGATTACAAGGATCACGA  
CATTGACTACAAGGATGACGACGATAAAGGCGGTAGTGGCGGC

**Table S1. Plasmids used in this study.**

| Plasmid code | Plasmid name                    | Promoter/terminator | Gene cloned         | Reference  |
|--------------|---------------------------------|---------------------|---------------------|------------|
| pYC1         | pRS316-Mmm1                     | Own/Own             | Mmm1                | [34]       |
| pYC1         | pRS316-Mdm12                    | Own/Own             | Mdm12               | [34]       |
| pYC91        | pRS314-Vps13-D716H              | Own/Own             | Vps13-D716H         | [7]        |
| pYM21        | pRS424-Mcp1                     | Own/Own             | Mcp1                | [14]       |
| pYU41        | pRS313-GPDp-MCS-CYC1ter         | GPD/CYC1            | None                | This study |
| pYU47        | pRS314-GPDp-MCS-CYC1ter         | GPD/CYC1            | None                | This study |
| pYU53        | pRS315-GPDp-MCS-CYC1ter         | GPD/CYC1            | None                | This study |
| pYU54        | pRS315-ADH1p-MCS-CYC1ter        | ADH1/CYC1           | None                | This study |
| pYU59        | pRS315-ADH1p-MCS-CYC1ter        | GPD/CYC1            | None                | This study |
| pYU101       | pFA6a-mScarlet-KanMX4           | None/ADH1           | mScarlet            | This study |
| pSFL1        | pTAC2-GFP1-10                   | None                | GFP1-10             | This study |
| pSFL2        | pTAC2-GFP11                     | None                | GFP11               | This study |
| pSFL9        | pRS316-GPDp-GFP1-10             | GPD/CYC1            | GFP1-10             | This study |
| pSFL10       | pRS314-GPDp-GFP1-10             | GPD/CYC1            | GFP1-10             | This study |
| pSFL11       | pRS316-GPDp-GFP11               | GPD/CYC1            | GFP11               | This study |
| pSFL12       | pRS314-GPDp-GFP11               | GPD/CYC1            | GFP11               | This study |
| pSFL15       | pRS314-GPDp-YNR021W-GFP11       | GPD/CYC1            | YNR021W-GFP11       | This study |
| pSFL16       | pRS316-GPDp-lfa38-GFP1-10       | GPD/CYC1            | lfa38-GFP1-10       | This study |
| pSFL17       | pRS315-GPDp-lfa38-GFP1-10       | GPD/CYC1            | lfa38-GFP1-10       | This study |
| pSFL19       | pRS316-GPDp-Vph1-GFP1-10        | GPD/CYC1            | Vph1-GFP1-10        | This study |
| pSFL20       | pRS315-GPDp-Vph1-GFP1-10        | GPD/CYC1            | Vph1-GFP1-10        | This study |
| pSFL21       | pRS314-GPDp-Vph1-GFP11          | GPD/CYC1            | Vph1-GFP11          | This study |
| pSFL22       | pRS316-GPDp-Tom71-GFP1-10       | GPD/CYC1            | Tom71-GFP1-10       | This study |
| pSFL23       | pRS314-GPDp-Tom71-GFP11         | GPD/CYC1            | Tom71-GFP11         | This study |
| pSFL26       | pRS316-GPDp-Pex3N-GFP1-10       | GPD/CYC1            | Pex3N-GFP1-10       | This study |
| pSFL28       | pRS316-GPDp-Erg6-GFP1-10        | GPD/CYC1            | Erg6-GFP1-10        | This study |
| pSFL61       | pRS316-GPDp-lfa38-mCherry-GFP11 | GPD/CYC1            | lfa38-mCherry-GFP11 | This study |
| pSFL66       | pRS314-GPDp-lfa38-3xFLAG-GFP11  | GPD/CYC1            | lfa38-3xFLAG-GFP11  | This study |

|        |                                |                           |                          |            |
|--------|--------------------------------|---------------------------|--------------------------|------------|
| pSFL67 | pRS314-GDPp-Erg6-3xFLAG-GFP11  | GPD/CYC1                  | Erg6-3xFLAG-GFP11        | This study |
| pSFL69 | pRS314-GDPp-Pex3N-3xFLAG-GFP11 | GPD/CYC1                  | Pex3N-3xFLAG-GFP11       | This study |
| pSFL73 | pRS314-GDPp-3xFLAG-GFP11       | GPD/CYC1                  | 3xFLAG-GFP11             | This study |
| pSFL74 | pRS314-GDPp-V5-GFP11           | GPD/CYC1                  | V5-GFP11                 | This study |
| pSFL75 | pRS314-GDPp-Tom71-V5-GFP11     | GPD/CYC1                  | Tom71-V5-GFP11           | This study |
| pSFL84 | pRS313-GDPp-Tom71-V5-GFP11     | GPD/CYC1                  | Tom71-V5-GFP11           | This study |
| pFL16  | pRS315-GDPpBipN-mCherry-HDEL   | GPD/CYC1                  | BipN-mCherry-HDEL        | This study |
| pFL24  | pRS315-ADH1p-mCherry-PTS1      | ADH1/CYC1                 | mCherry-PTS1             | This study |
| pFL72  | pRS315-ADH1p-Erg6-mCherry      | ADH1/CYC1                 | Erg6-mCherry             | This study |
| pMM73  | pCDNA3.1-Sec63(1-240)-V5-eGFP  | CMV/bGH<br>poly(A) signal | Sec63(1-240)-V5-eGFP     | This study |
| pMM75  | pCDNA3.1-Tom20(1-33)-FLAG-eGFP | CMV/bGH<br>poly(A) signal | Tom20(1-33)-FLAG-eGFP    | This study |
| pMM76  | pCDNA3.1-Tom70(1-70)-FLAG-eGFP | CMV/bGH<br>poly(A) signal | Tom70(1-70)-FLAG-eGFP    | This study |
| pMM77  | pCDNA3.1-ERdj1(1-200-)V5-eGFP  | CMV/bGH<br>poly(A) signal | ERj1(1-200-)V5-eGFP      | This study |
| pMM80  | pCDNA3.1_Tom20_GFP(1-10)       | CMV/bGH<br>poly(A) signal | Tom20(1-33)-FLAG-GFP1-10 | This study |
| pMM82  | pCDNA3.1_Tom70_GFP(1-10)       | CMV/bGH<br>poly(A) signal | Tom70(1-70)-FLAG-GFP1-10 | This study |
| pMM87  | pCDNA3.1_ERj1_GFP(11)          | CMV/bGH<br>poly(A) signal | ERj1(1-200-)V5-GFP11     | This study |
| pMM89  | pCDNA3.1_Sec63_GFP(11)         | CMV/bGH<br>poly(A) signal | Sec63(1-240)-V5-GFP11    | This study |

**Table. S2. Primers used in this study.**

| Name   | sequence (5'-3')                     |
|--------|--------------------------------------|
| #YU291 | AATTGCGGCCGCATGTCTAGTTCAATATTTGGCCC  |
| #YU292 | CCCGGATCCCTGAAATCTTGTTCTTTGCTTGTTTTG |
| #YU293 | AATTGCGGCCGCATGACTTTTATGCAACAGCTTC   |

|         |                                                          |
|---------|----------------------------------------------------------|
| #YU294  | CCCGGATCCTTCCTTTTTAACCTGTCTTG                            |
| #YU295  | AATTGCGGCCGCATGGCAGAGAAGGAGGAAGC                         |
| #YU296  | CCCGGATCCGCTTGAAGCGGAAGAGCTTGC                           |
| #YU297  | AATTGCGGCCGCATGGCCGAAAACCTCCCTCCTG                       |
| #YU298  | CCCGGATCCAAGCATGCCTTTAGCCCTATAAC                         |
| #YU305  | AATTGCGGCCGCATGGCCCCAAATCAAAGATC                         |
| #YU306  | CCCGGATCCGATCTGTTCTTTGATGAAGTG                           |
| #YU307  | AATTGCGGCCGCATGAGTGAAACAGAATTGAG                         |
| #YU308  | CCCGGATCCTTGAGTTGCTTCTTGGAAG                             |
| #NU892  | AAAGCGGCCGCATGTTTTCAACAGACTAAG                           |
| #NU893  | CCCACTAGTTTCTACATCATCGGCACCTCT                           |
| #NU946  | CCCACTAGTATGGTGAGCAAGGGCGAGGAG                           |
| #NU948  | AAACTCGAGTTACAATTCATCATGCTTGTACAGCTCGTCCATGCC            |
| #YU377  | CCCGGATCCATGGTGAGCAAGGGCGAGGAGGAT                        |
| #YU378  | CCCGAATTCTTACAATTTGAGCCACCAGACCCTCCCTTGTACAGCTCGTCCATGCC |
| #NU539  | CCCACTAGTATGGTGAGCAAGGGCGAGGAGGATAAC                     |
| #NU540  | CCCCGGATCCTTGTACAGCTCGTCCATGCCGCCGG                      |
| #YU1006 | CATAGGATCCTTACTTTTCGTTGGGATCTTTCGAA                      |
| #YU1007 | CATAGGATCCTTATGTAATCCCAGCAGCATTTACG                      |
| #YU1008 | CCCTCTAGAGCCACCATGGGTGGCACTAG                            |
| #YU1009 | CCCTCTAGAGCCACCATGGATGGAGGGTC                            |
